# Supplementary material for: Electrospun Benzimidazole-Based Polyimide Membrane for Supercapacitor Applications
Source: Membranes (Basel). 2022 Sep 30;12(10):961. doi: 10.3390/membranes12100961 (PMC9607089; doi:10.3390/membranes12100961)
Supplement: Supplementary file 1 [file membranes-12-00961-s001.zip › membranes-1924909-supplementary.pdf]

## Article

# Electrospun Benzimidazole-Based Polyimide Membrane for Supercapacitor Applications

Yu-Hsiang Lu <sup>1</sup>, Yen-Zen Wang <sup>1,\*</sup>, Ming-Ying Tsai <sup>2</sup>, Hong-Ping Lin <sup>2</sup> and Chun-Han Hsu <sup>3,\*</sup>

<sup>1</sup> Department of Chemical and Materials Engineering, National Yunlin University of Science and Technology, No. 123, Sec. 3, University Road, Douliou 64002, Taiwan

<sup>2</sup> Department of Chemistry, National Cheng Kung University, No. 1 University Road, Tainan City 70101, Taiwan

<sup>3</sup> General Education Center, National Tainan Junior College of Nursing, No. 78, Sec. 2, Minzu Road, Tainan City 700, Taiwan

\* Correspondence: wangzen@yuntech.edu.tw (Y.-Z.W.); chhsu@ntin.edu.tw (C.-H.H.)

**Citation:** Lu, Y.-H.; Wang, Y.-Z.; Tsai, M.-Y.; Lin, H.-P.; Hsu, C.-H. Electrospun Benzimidazole-Based Polyimide Membrane for Supercapacitor Applications. *Membranes* **2022**, *12*, 961. <https://doi.org/10.3390/membranes12100961>

Academic Editor: Scott M. Husson

Received: 3 September 2022

Accepted: 26 September 2022

Published: 30 September 2022

**Publisher's Note:** MDPI stays neutral with regard to jurisdictional claims in published maps and institutional affiliations.

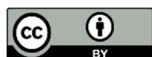

**Copyright:** © 2022 by the authors. Licensee MDPI, Basel, Switzerland. This article is an open access article distributed under the terms and conditions of the Creative Commons Attribution (CC BY) license (<https://creativecommons.org/licenses/by/4.0/>).

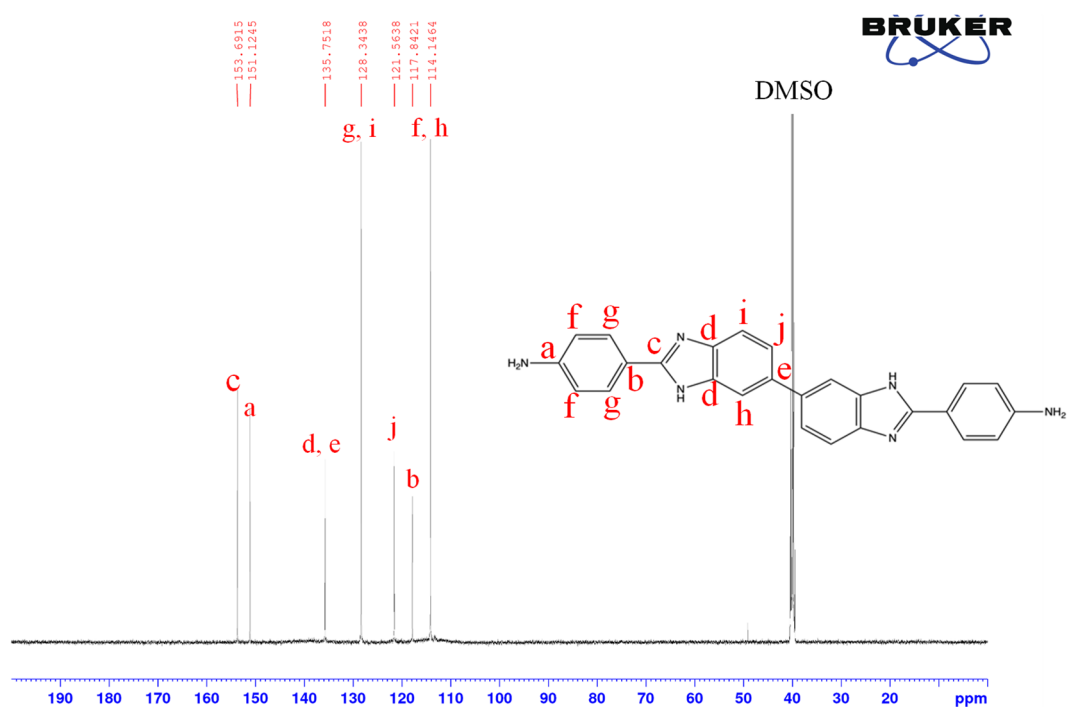

**Figure S1.**  $^{13}\text{C}$  NMR spectra of BAPBI in  $\text{DMSO-}d_6$

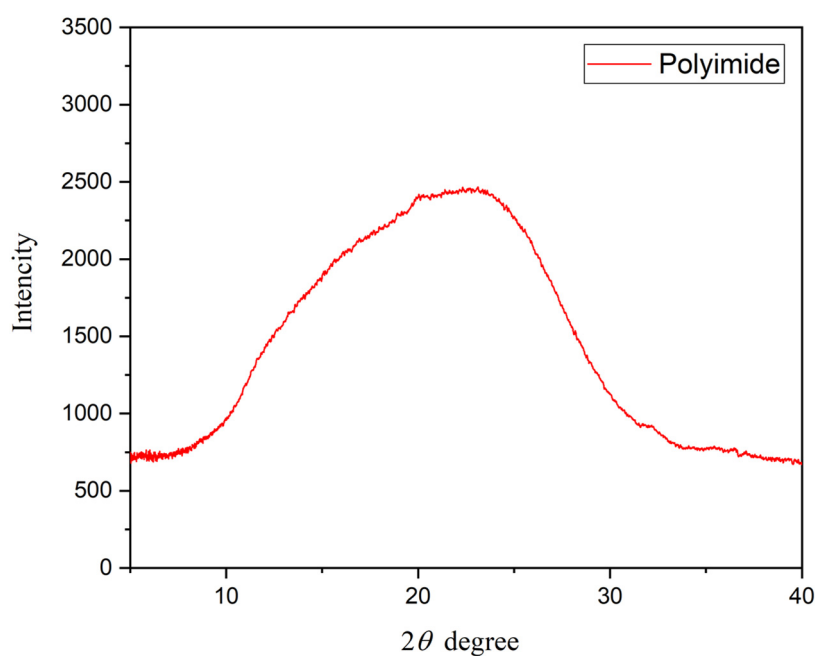

**Figure S2.** XRD diagram of BI-PI polymer.

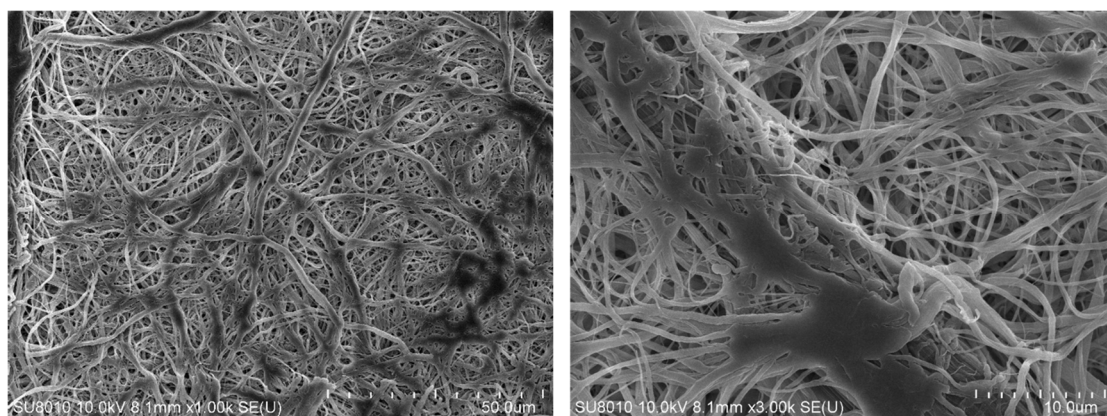

**Figure S3.** SEM images of commercial cellulose separator (TF-4030).

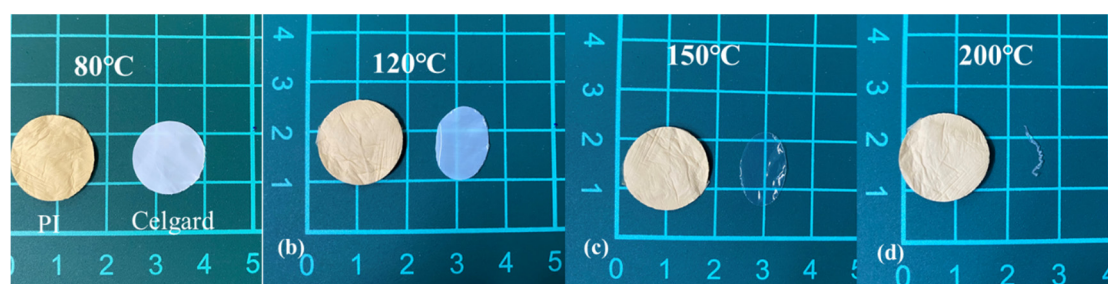

**Figure S4.** Thermal dimensional stability test results for BI-PI separator and Celgard H1612 separator.

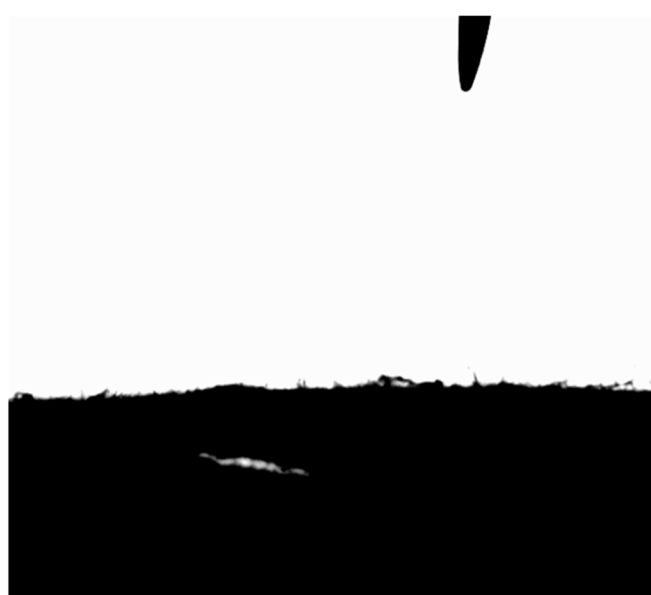

**Figure S5.** Contact angle test results for hot-pressed BI-PI separator.
